# Supplementary material
Source: publisher site journal article supplement (https://www.spandidos-publications.com/5145/downloadSupplementary)

Video S1: Video of hysteroscopy prior to tumor resection.

Video S2: Postoperative follow-up hysteroscopy video.

Figure S1. Positive staining of glycipan-3 (magnification, x10; scale bar, 100  $\mu$ m; immunohistochemical staining).

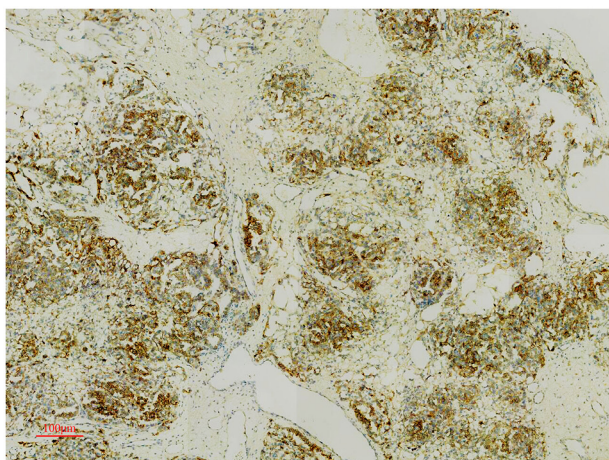

Figure S2. Positive staining of  $\beta$ -human chorionic gonadotropin (magnification,  $\times 10$ ; scale bar,  $100\ \mu\text{m}$ ; immunohistochemical staining).

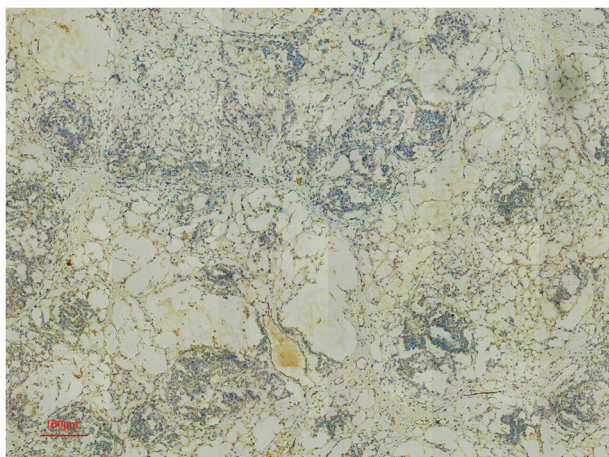

Figure S3. Positive staining of Sal-like protein 4 (magnification, x10; scale bar, 100  $\mu$ m; immunohistochemical staining).

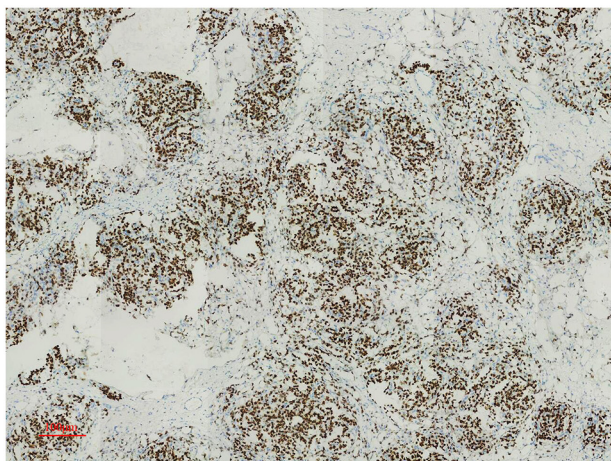

Supplement: Supplementary file 1 [file downloadSupplementary]
